# Supplementary material for: Turning preference in dogs: North attracts while south repels
Source: PubMed Central journal article supplement (PMC7842976; doi:10.1371/journal.pone.0245940), 2021-01-28
Supplement: pone.0245940.s005.pdf [file pone.0245940.s005.pdf]

Dear Prof. Roman,

we are pleased about the positive views of the reviewers and appreciate also the careful editing of the manuscript by the reviewer #1:

We accepted all but one suggestions:

Lines 153-162 — paragraph should be in past tense

*Corrected*

Line 219 tense shift

*Corrected*

Line 244 “according to based on” (redundant)

*We have not changed this sentence, because "based on first trials" is here a complementary information, a fact, which should be pointed out*

Line 326 “more frequently” need to add "chosen”

*Corrected*

In the figure caption for Fig 1 please give a sense of what these numbers mean. - ie - left and + right? We don't need the full explanation that comes later in the text, but a sense of what these numbers are telling us would be helpful at this point.

*The reviewer means probably Table 1 and/or Figure 3. We complemented the caption in both cases as suggested.*

I still find the figures confusing, but I'm not an expert on how to present these results with turning preference so I leave it to the other reviewer and the editor's expertise.

*We assure the reviewer that this way of illustrating the results is common in the literature dealing with spatial orientation.*

Once again, many thanks for considering our manuscript and its academic processing.

With best regards and wishes for a prosperous and healthy new year

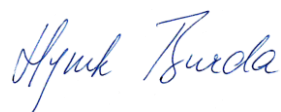

Hynek Burda

On behalf of all coauthors.
